# Supplementary material for: Genome-Wide Transcriptome Analysis of Cadmium Stress in Rice
Source: Hindawi journal article supplement (doi:10.1155/2016/9739505), 2016-01-01
Supplement: f1 [file 9739505.f1.pdf]

A

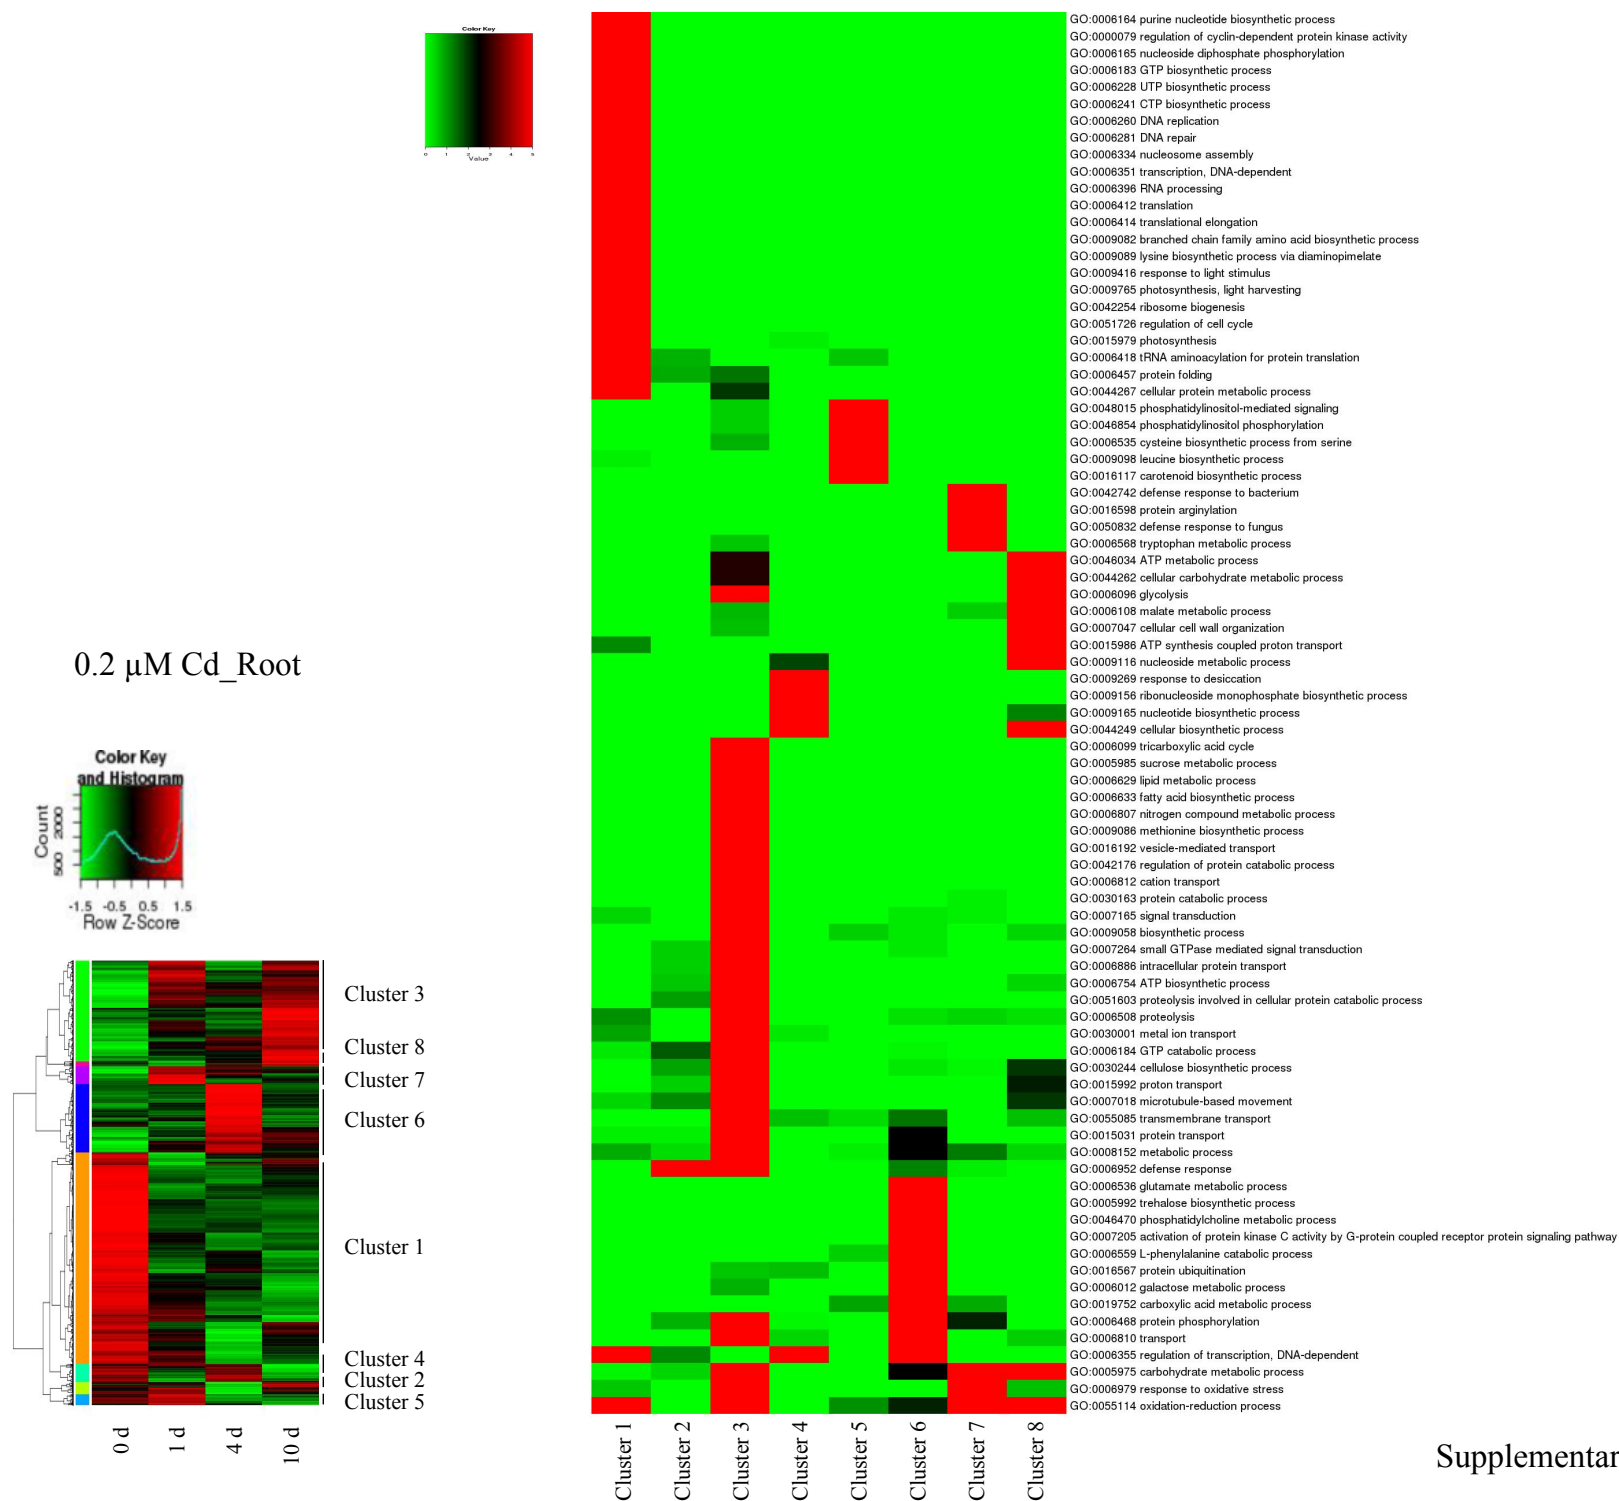

Supplementary Figure S1

B

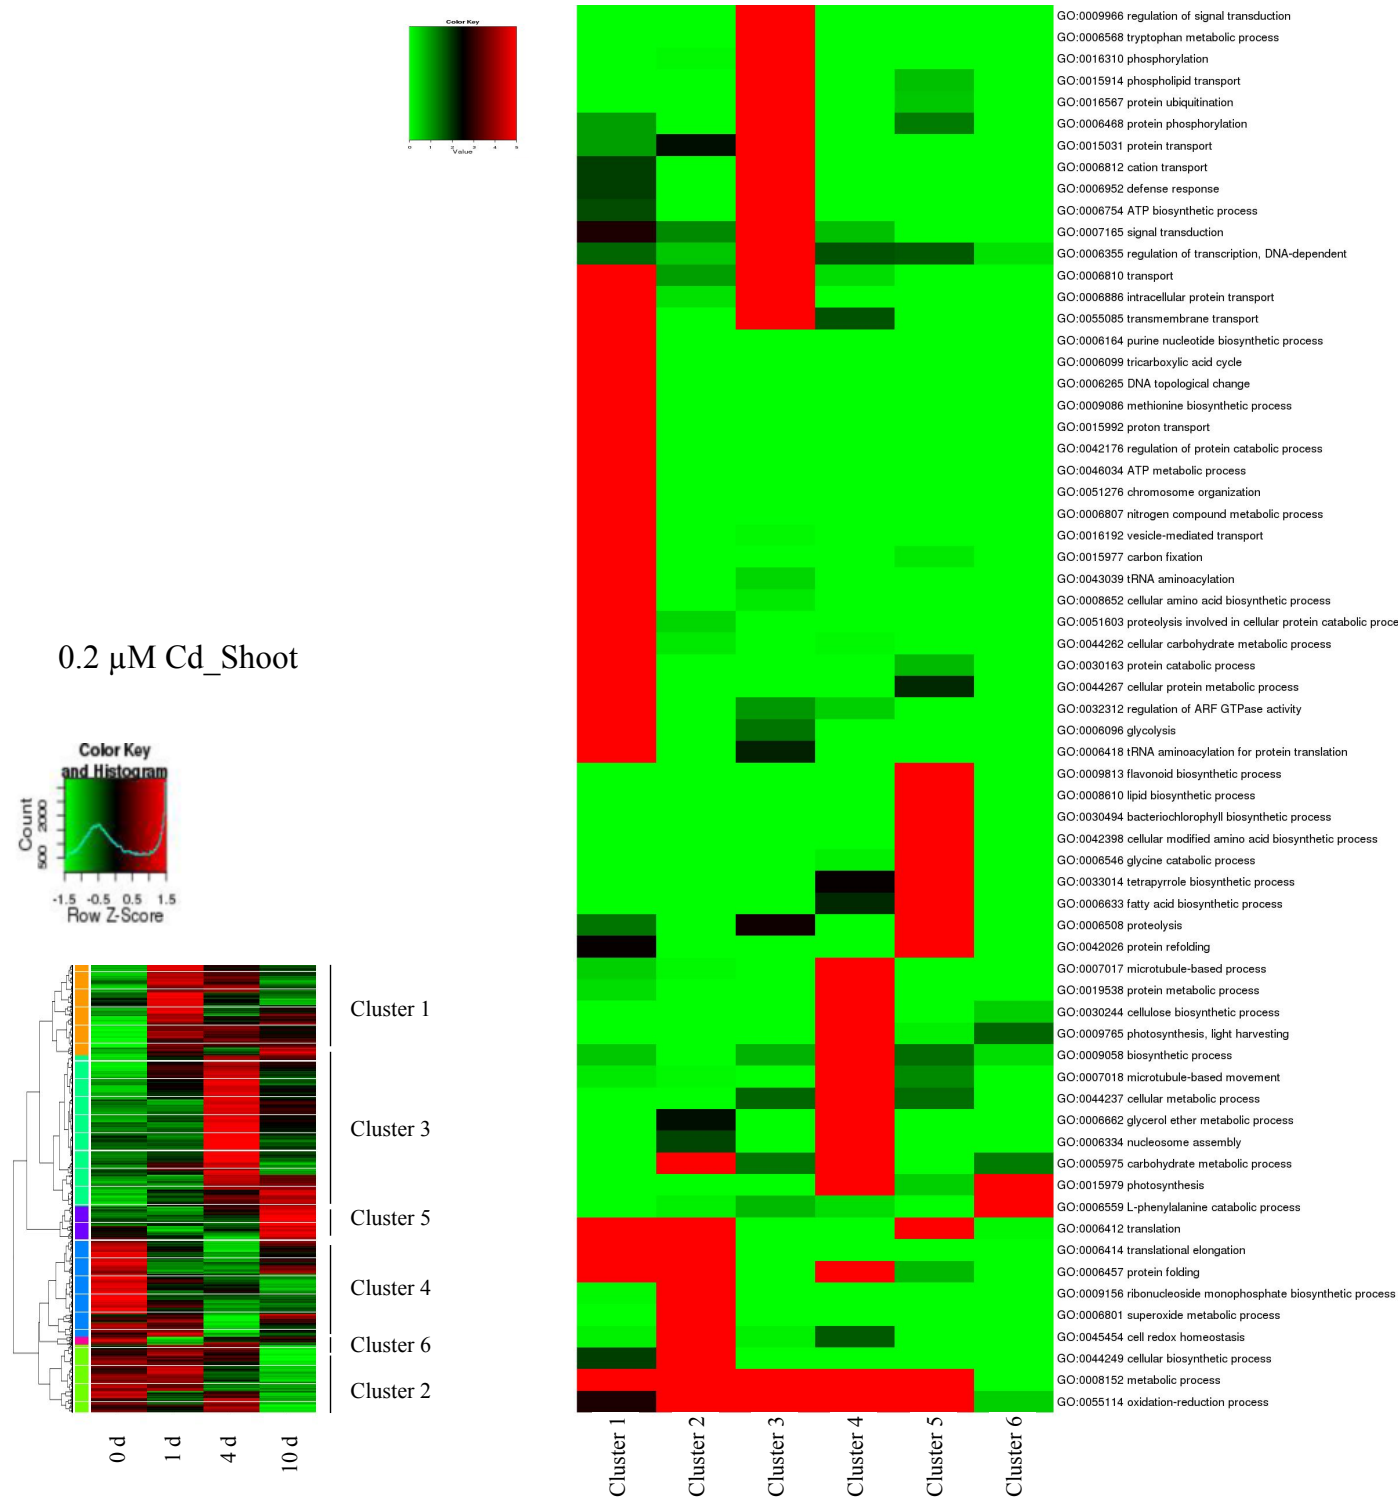

Supplementary Figure S1

C

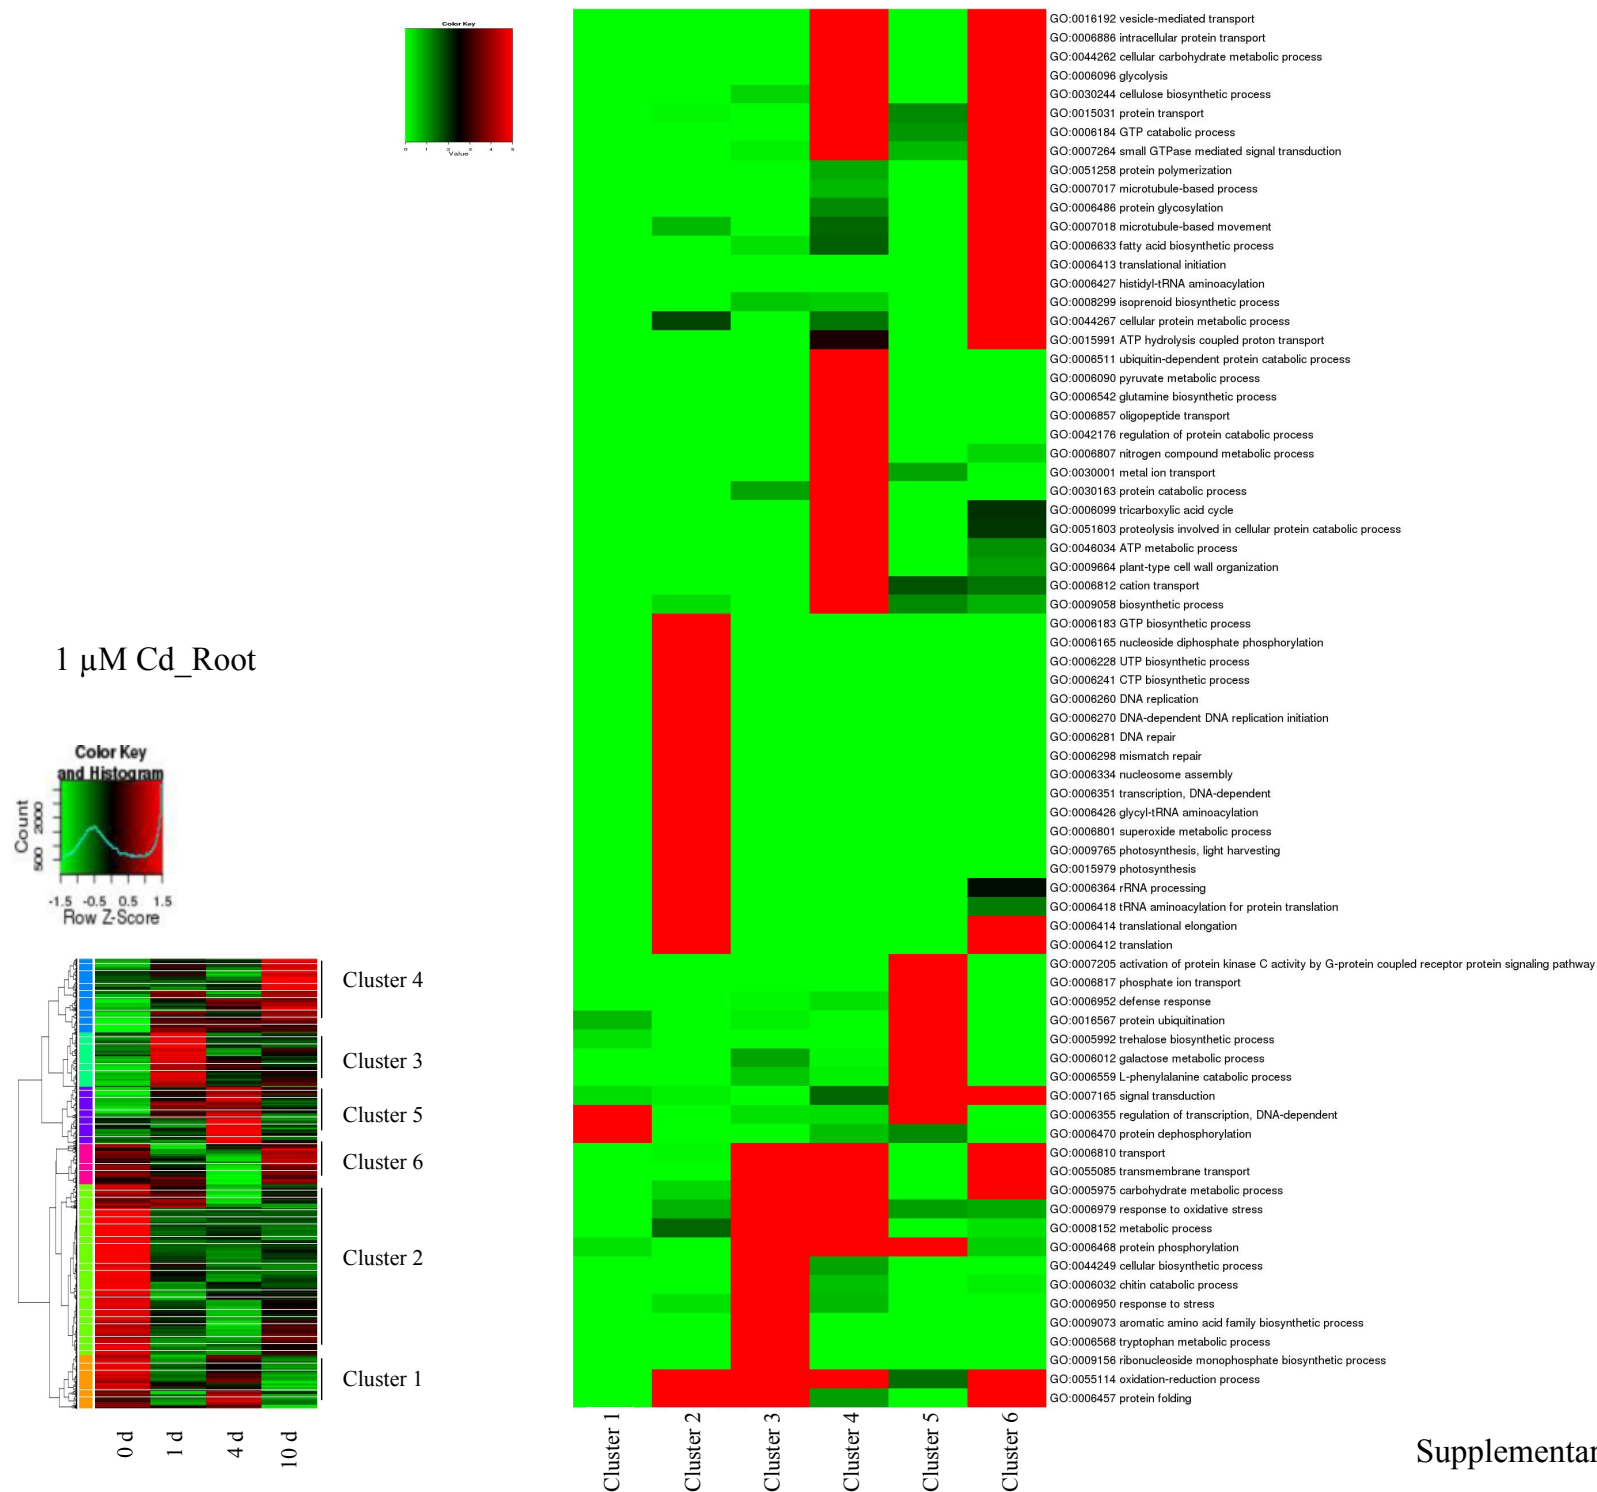

Supplementary Figure S1

D

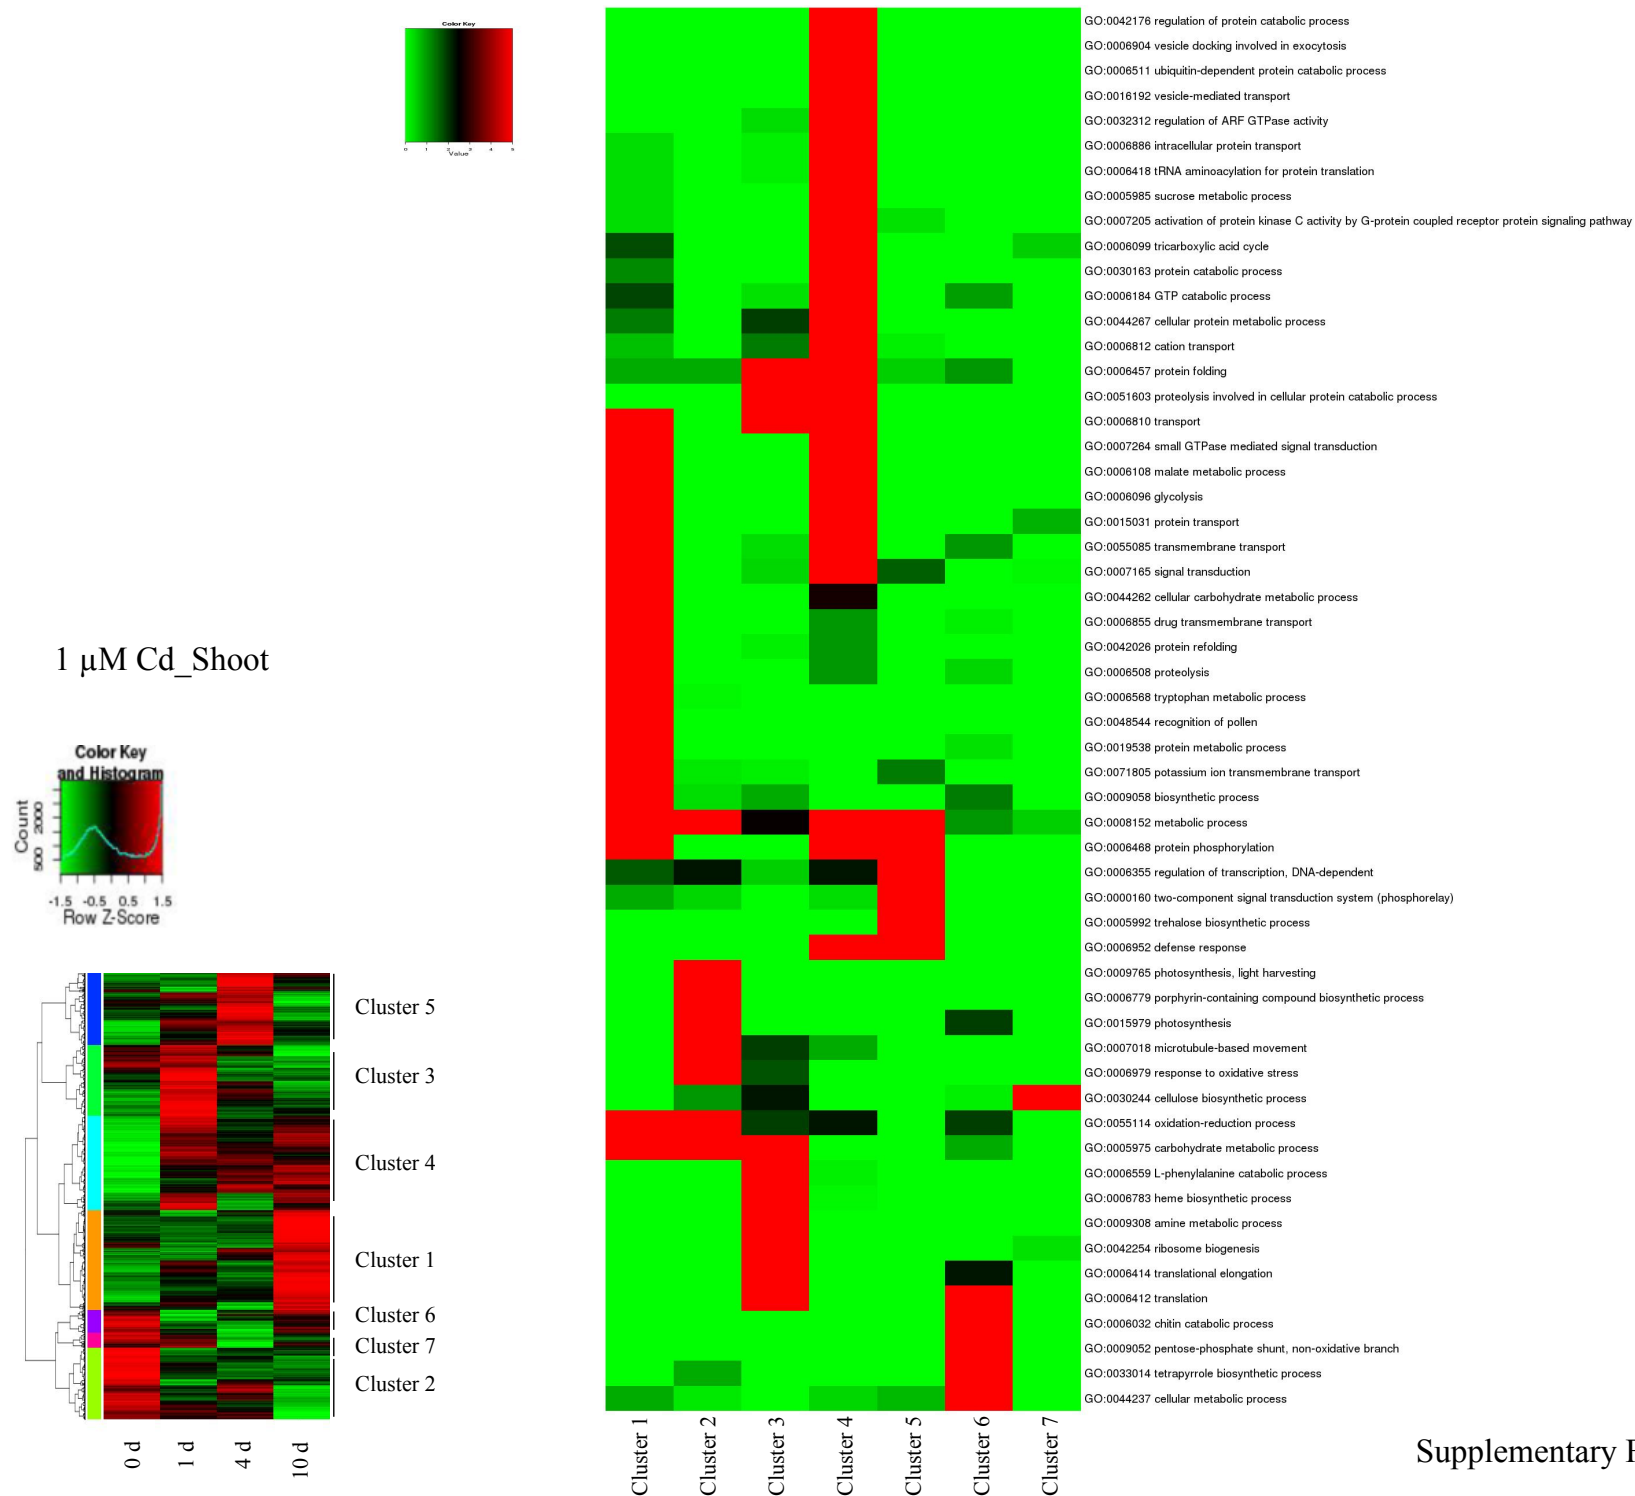

Supplementary Figure S1

A

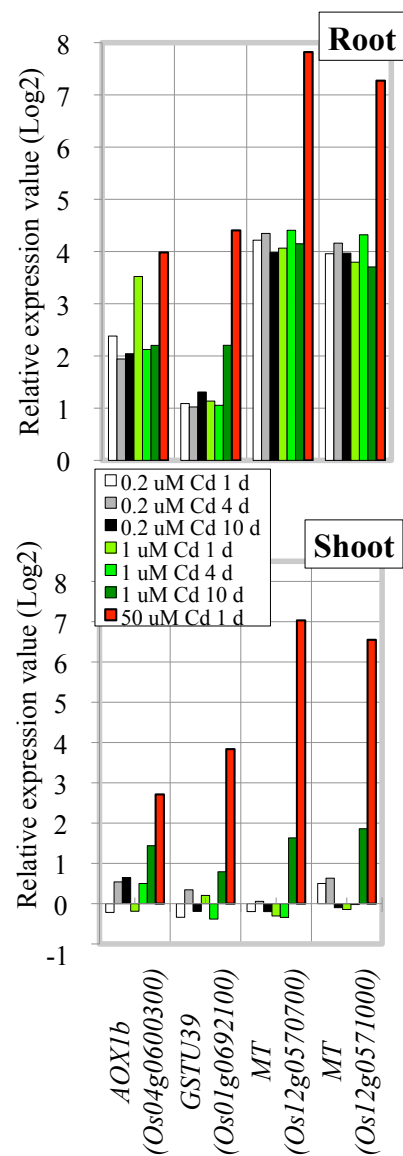

B

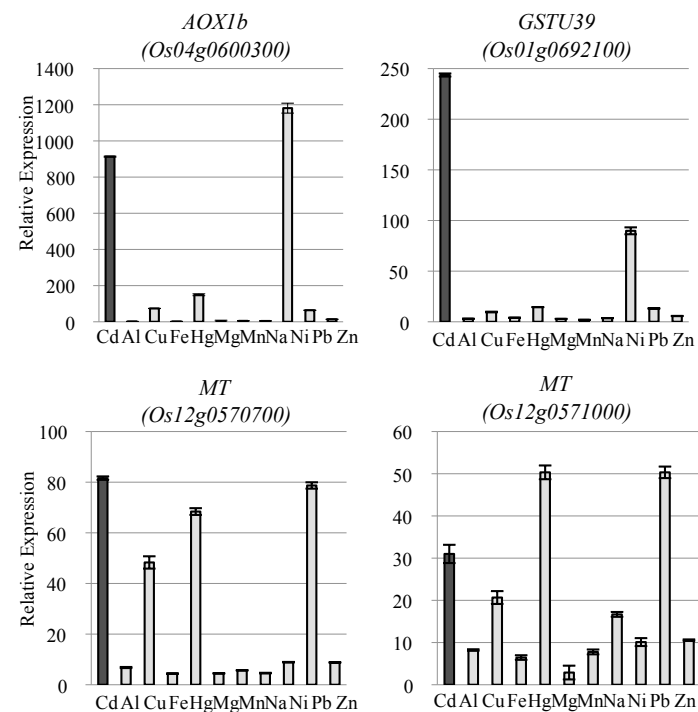

Supplementary Table S1. Mapping of RNA-Seq reads obtained from root and shoot samples to the reference IRGSP-1.0 genome sequence.

| Sample |                |      | Preprocessed reads | Aligned  | %     | Unique non-junc | %     | Unique junc | %     | Multi   | %    | Unaligned | %     |
|--------|----------------|------|--------------------|----------|-------|-----------------|-------|-------------|-------|---------|------|-----------|-------|
| Root   | Control        | 0 d  | 27583462           | 23866366 | 86.52 | 17979889        | 65.18 | 4914667     | 17.82 | 971810  | 3.52 | 3717096   | 13.48 |
|        | 0.2 $\mu$ M Cd | 1 d  | 9988187            | 8303026  | 83.13 | 6120296         | 61.28 | 1857792     | 18.60 | 324938  | 3.25 | 1685161   | 16.87 |
|        |                | 4 d  | 10796972           | 9651791  | 89.39 | 7126843         | 66.01 | 2166457     | 20.07 | 358491  | 3.32 | 1145181   | 10.61 |
|        |                | 10 d | 10946913           | 9261544  | 84.60 | 6717523         | 61.36 | 2190187     | 20.01 | 353834  | 3.23 | 1685369   | 15.40 |
|        | 1 $\mu$ M Cd   | 1 d  | 11963408           | 10655539 | 89.07 | 7904136         | 66.07 | 2339255     | 19.55 | 412148  | 3.45 | 1307869   | 10.93 |
|        |                | 4 d  | 11104337           | 10253176 | 92.33 | 7673423         | 69.10 | 2214831     | 19.95 | 364922  | 3.29 | 851161    | 7.67  |
|        |                | 10 d | 23128192           | 18958499 | 81.97 | 13790354        | 59.63 | 4461941     | 19.29 | 706204  | 3.05 | 4169693   | 18.03 |
| Shoot  | Control        | 0 d  | 28320011           | 27672810 | 97.71 | 20666053        | 72.97 | 6063038     | 21.41 | 943719  | 3.33 | 647201    | 2.29  |
|        | 0.2 $\mu$ M Cd | 1 d  | 11361926           | 11078040 | 97.50 | 7990472         | 70.33 | 2627344     | 23.12 | 460224  | 4.05 | 283886    | 2.50  |
|        |                | 4 d  | 10075073           | 9835486  | 97.62 | 7150808         | 70.98 | 2341532     | 23.24 | 343146  | 3.41 | 239587    | 2.38  |
|        |                | 10 d | 28595535           | 28014745 | 97.97 | 20391652        | 71.31 | 6619292     | 23.15 | 1003801 | 3.51 | 580790    | 2.03  |
|        | 1 $\mu$ M Cd   | 1 d  | 12386946           | 12097953 | 97.67 | 8726675         | 70.45 | 2881805     | 23.26 | 489473  | 3.95 | 288993    | 2.33  |
|        |                | 4 d  | 14603307           | 14296796 | 97.90 | 10363189        | 70.96 | 3424710     | 23.45 | 508897  | 3.48 | 306511    | 2.10  |
|        |                | 10 d | 17498911           | 17093191 | 97.68 | 12285165        | 70.21 | 4253212     | 24.31 | 554814  | 3.17 | 405720    | 2.32  |

Supplementary Table S2. Cadmium up- and downregulated transcripts identified in roots and shoots by RNA-Seq analysis.

| Transcript                          | Description                                                          | Fold change |      |      |       |      |       |
|-------------------------------------|----------------------------------------------------------------------|-------------|------|------|-------|------|-------|
|                                     |                                                                      | Root        |      |      | Shoot |      |       |
|                                     |                                                                      | 1 d         | 4 d  | 10 d | 1 d   | 4 d  | 10 d  |
| Upregulated transcripts in shoots   |                                                                      |             |      |      |       |      |       |
| 0.2 $\mu$ M Cd                      |                                                                      |             |      |      |       |      |       |
| <i>Os04t0301500-01</i>              | HLH (helix-loop-helix) DNA-binding domain containing protein         | 0.4         | 33.1 | 0.5  | 1.0   | 47.5 | 9.2   |
| <i>Os01t0162200-00</i>              | Leucine-rich repeat domain containing protein                        | 1.1         | 2.4  | 1.0  | 1.4   | 24.5 | 2.1   |
| <i>Os01t0162400-01</i>              | Conserved hypothetical protein                                       | 1.0         | 1.1  | 1.0  | 1.3   | 24.1 | 2.1   |
| <i>Os11t0151400-01</i>              | Cytochrome P450 family protein                                       | 0.9         | 15.5 | 1.1  | 0.9   | 22.2 | 5.5   |
| <i>Os01t0162300-01</i>              | Leucine-rich repeat, plant specific containing protein               | 1.0         | 3.0  | 0.9  | 1.0   | 22.2 | 1.8   |
| <i>Os03t0183500-01</i>              | Protein of unknown function DUF581 family protein                    | 1.0         | 13.0 | 0.7  | 2.2   | 21.0 | 6.5   |
| <i>Os07t0142100-00</i>              | Conserved hypothetical protein                                       | 0.9         | 1.1  | 0.9  | 1.0   | 1.0  | 213.6 |
| <i>Os01t0647200-04</i>              | Non-protein coding transcript                                        | 0.8         | 1.7  | 1.3  | 0.4   | 0.5  | 83.9  |
| <i>Os01t0647200-01</i>              | Hypothetical conserved gene                                          | 0.9         | 2.0  | 1.3  | 0.7   | 0.8  | 61.2  |
| <i>Os10t0195250-01</i>              | Conserved hypothetical protein                                       | 3.7         | 6.8  | 7.7  | 1.0   | 1.3  | 54.9  |
| <i>Os07t0258400-02</i>              | Nramp1                                                               | 2.3         | 2.2  | 3.4  | 1.4   | 1.0  | 48.5  |
| <i>Os07t0258400-01</i>              | Nramp1                                                               | 2.3         | 2.3  | 3.5  | 1.2   | 0.9  | 42.5  |
| <i>Os01t0952800-01</i>              | Achaete-scute transcription factor related domain containing protein | 2.6         | 4.3  | 6.1  | 1.0   | 5.1  | 32.2  |
| <i>Os11t0262600-00</i>              | Conserved hypothetical protein                                       | 2.0         | 5.8  | 8.0  | 1.0   | 1.0  | 28.5  |
| <i>Os12t0236225-00</i>              | Conserved hypothetical protein                                       | 2.7         | 6.2  | 6.8  | 0.9   | 0.9  | 23.0  |
| 1 $\mu$ M Cd                        |                                                                      |             |      |      |       |      |       |
| <i>Os07t0142100-00</i>              | Conserved hypothetical protein                                       | 0.9         | 1.1  | 0.9  | 1.2   | 1.4  | 302.6 |
| <i>Os01t0647200-04</i>              | Non-protein coding transcript                                        | 0.4         | 1.4  | 1.3  | 0.4   | 0.9  | 93.4  |
| <i>Os01t0647200-01</i>              | Hypothetical conserved gene                                          | 0.5         | 1.3  | 1.4  | 0.7   | 0.9  | 72.3  |
| <i>Os10t0195250-01</i>              | Conserved hypothetical protein                                       | 2.9         | 5.0  | 6.4  | 0.9   | 1.0  | 62.4  |
| <i>Os07t0258400-02</i>              | Nramp1                                                               | 1.5         | 2.8  | 2.5  | 1.1   | 1.1  | 56.2  |
| <i>Os07t0258400-01</i>              | Nramp1                                                               | 1.6         | 2.8  | 2.7  | 1.0   | 1.0  | 49.7  |
| <i>Os05t0202800-00</i>              | MT (metallothionein)-like protein 3B                                 | 1.0         | 5.3  | 2.4  | 1.0   | 4.7  | 39.6  |
| <i>Os01t0952800-01</i>              | Achaete-scute transcription factor related domain containing protein | 1.7         | 5.1  | 3.9  | 1.0   | 1.7  | 29.3  |
| <i>Os11t0262600-00</i>              | Conserved hypothetical protein                                       | 1.9         | 5.4  | 5.7  | 1.0   | 1.0  | 27.3  |
| <i>Os12t0236225-00</i>              | Conserved hypothetical protein                                       | 1.8         | 3.9  | 4.2  | 0.9   | 0.9  | 21.8  |
| <i>Os01t0155800-01</i>              | Conserved hypothetical protein                                       | 2.8         | 6.4  | 8.3  | 0.4   | 0.5  | 21.0  |
| Downregulated transcripts in roots  |                                                                      |             |      |      |       |      |       |
| 0.2 $\mu$ M Cd                      |                                                                      |             |      |      |       |      |       |
| <i>Os02t0585700-00</i>              | Quinonprotein alcohol dehydrogenase-like domain containing protein   | 0.05        | 0.00 | 0.00 | 1.35  | 1.00 | 1.00  |
| <i>Os02t0585650-01</i>              | Hypothetical gene                                                    | 0.06        | 0.00 | 0.00 | 1.39  | 0.90 | 1.09  |
| <i>Os02t0586000-01</i>              | Quinonprotein alcohol dehydrogenase-like domain containing protein   | 0.06        | 0.00 | 0.00 | 1.34  | 1.10 | 0.95  |
| <i>Os03t0259500-00</i>              | Ubiquitin                                                            | 0.67        | 0.03 | 0.03 | 1.28  | 1.00 | 1.16  |
| <i>Os09t0483200-00</i>              | Ubiquitin/ribosomal fusion protein                                   | 0.60        | 0.03 | 0.09 | 1.00  | 1.00 | 1.07  |
| <i>Os03t0259551-00</i>              | Non-protein coding transcript                                        | 0.69        | 0.04 | 0.04 | 1.50  | 1.00 | 1.10  |
| <i>Os10t0386300-01</i>              | Conserved hypothetical protein                                       | 1.40        | 0.05 | 0.07 | 1.09  | 1.00 | 1.00  |
| <i>Os01t0304400-00</i>              | Conserved hypothetical protein                                       | 0.07        | 0.05 | 0.12 | 0.63  | 0.51 | 0.80  |
| <i>Os09t0483150-00</i>              | Hypothetical gene                                                    | 0.47        | 0.05 | 0.08 | 1.00  | 1.00 | 1.10  |
| 1 $\mu$ M Cd                        |                                                                      |             |      |      |       |      |       |
| <i>Os02t0585700-00</i>              | Quinonprotein alcohol dehydrogenase-like domain containing protein   | 0.00        | 0.00 | 0.00 | 1.00  | 1.00 | 1.00  |
| <i>Os02t0585650-01</i>              | Hypothetical gene                                                    | 0.01        | 0.00 | 0.00 | 0.90  | 0.90 | 0.90  |
| <i>Os09t0452700-00</i>              | Ubiquitin                                                            | 0.01        | 0.04 | 0.03 | 1.44  | 1.09 | 1.00  |
| <i>Os02t0586000-01</i>              | Quinonprotein alcohol dehydrogenase-like domain containing protein   | 0.01        | 0.00 | 0.00 | 1.08  | 0.95 | 0.95  |
| <i>Os03t0259551-00</i>              | Non-protein coding transcript                                        | 0.02        | 0.02 | 0.04 | 1.00  | 1.00 | 1.00  |
| <i>Os09t0483200-00</i>              | Ubiquitin/ribosomal fusion protein                                   | 0.02        | 0.05 | 0.06 | 1.00  | 1.00 | 1.00  |
| <i>Os09t0452750-00</i>              | Non-protein coding transcript                                        | 0.02        | 0.05 | 0.04 | 1.00  | 1.20 | 1.00  |
| <i>Os03t0259500-00</i>              | Ubiquitin                                                            | 0.02        | 0.02 | 0.04 | 1.00  | 1.00 | 1.00  |
| <i>Os09t0483350-00</i>              | Non-protein coding transcript                                        | 0.03        | 0.07 | 0.10 | 0.77  | 0.79 | 0.47  |
| <i>Os11t0428800-01</i>              | Cupredoxin domain containing protein                                 | 0.03        | 0.32 | 0.14 | 1.00  | 1.38 | 1.40  |
| <i>Os12t0291100-02</i>              | Ribulose biphosphate carboxylase small chain                         | 0.04        | 0.09 | 0.07 | 0.45  | 0.48 | 0.57  |
| <i>Os09t0483400-01</i>              | Ubiquitin/ribosomal fusion protein                                   | 0.04        | 0.08 | 0.08 | 1.39  | 0.86 | 1.02  |
| <i>Os03t0307300-01</i>              | Nicotianamine synthase 1                                             | 0.04        | 0.64 | 1.22 | 1.00  | 1.00 | 1.17  |
| <i>Os09t0483150-00</i>              | Hypothetical gene                                                    | 0.05        | 0.08 | 0.06 | 1.00  | 1.00 | 1.00  |
| <i>Os12t0291100-01</i>              | Petunia ribulose 1,5-bisphosphate carboxylase small subunit          | 0.05        | 0.09 | 0.08 | 0.54  | 0.54 | 0.64  |
| <i>Os07t0625500-01</i>              | Fimbriata-associated protein                                         | 0.05        | 0.04 | 0.08 | 1.00  | 1.00 | 1.00  |
| <i>Os03t0103200-01</i>              | Physical impedance induced protein                                   | 0.50        | 0.02 | 0.06 | 1.18  | 1.91 | 0.78  |
| <i>Os10t0386300-01</i>              | Conserved hypothetical protein                                       | 0.06        | 0.05 | 0.08 | 1.17  | 1.00 | 1.00  |
| <i>Os03t0103300-00</i>              | QLTG-3-1 protein                                                     | 0.17        | 0.05 | 0.08 | 1.19  | 1.07 | 0.72  |
| <i>Os08t0536341-00</i>              | Non-protein coding transcript                                        | 0.21        | 0.05 | 0.04 | 0.56  | 0.63 | 0.67  |
| <i>Os04t0538400-01</i>              | Nodulin 21                                                           | 0.05        | 0.08 | 0.05 | 1.22  | 0.70 | 1.13  |
| Downregulated transcripts in shoots |                                                                      |             |      |      |       |      |       |
| 1 $\mu$ M Cd                        |                                                                      |             |      |      |       |      |       |
| <i>Os03t0658800-03</i>              | Cytochrome P450 family protein                                       | 0.62        | 0.69 | 0.62 | 0.12  | 0.05 | 0.02  |
| <i>Os03t0658800-01</i>              | Cytochrome P450 family protein                                       | 0.63        | 0.69 | 0.63 | 0.12  | 0.05 | 0.03  |
| <i>Os05t0190300-01</i>              | Acid phosphatase (Class B) family protein                            | 1.00        | 1.00 | 1.05 | 0.34  | 0.14 | 0.02  |
| <i>Os10t0409400-01</i>              | Polygalacturonase isoenzyme 1 beta subunit precursor                 | 0.90        | 0.97 | 0.90 | 0.91  | 0.09 | 0.03  |
| <i>Os06t0473000-01</i>              | Hypothetical conserved gene                                          | 0.47        | 0.47 | 0.76 | 0.27  | 0.22 | 0.04  |
| <i>Os11t0645400-01</i>              | Plant disease resistance response family protein                     | 0.89        | 1.81 | 5.08 | 0.25  | 0.11 | 0.04  |

Reads were mapped to the rice genome and responsive genes were identified by G-tests. Transcripts upregulated more than 20-fold or downregulated less than 0.05-fold in one or more treatments/time points in root and shoot are shown. Transcripts in bold were upregulated under both 1 and 0.2  $\mu$ M Cd exposure.

Supplementary Table S3. Gene expression of metal ion transporters identified in rice.

| Family        | Transcript             | Fold change |           |             |             |           |             |
|---------------|------------------------|-------------|-----------|-------------|-------------|-----------|-------------|
|               |                        | Root        |           |             | Shoot       |           |             |
|               |                        | 0.2 $\mu$ M | 1 $\mu$ M | 50 $\mu$ M  | 0.2 $\mu$ M | 1 $\mu$ M | 50 $\mu$ M  |
| Cation_efflux | <i>Os01t0130000-01</i> | 0.7         | 0.7       | 1.0         | 1.0         | 1.0       | <b>6.7</b>  |
|               | <i>Os08t0422200-00</i> | 1.0         | 1.0       | 1.0         | 1.0         | 1.0       | 0.6         |
|               | <i>Os02t0775100-01</i> | 0.8         | 0.6       | 1.0         | 1.0         | 1.2       | 0.5         |
|               | <i>Os01t0130000-02</i> | 0.7         | 0.6       | 0.9         | 1.0         | 1.0       | <b>5.8</b>  |
|               | <i>Os05t0128400-01</i> | 1.5         | 1.4       | 0.9         | 1.2         | 1.5       | 1.0         |
|               | <i>Os01t0837800-01</i> | 1.3         | 1.4       | 0.7         | 1.3         | 1.4       | 3.6         |
|               | <i>Os01t0837800-02</i> | 1.3         | 1.4       | 0.7         | 1.3         | 1.4       | 3.4         |
|               | <i>Os05t0461900-00</i> | 1.0         | 1.0       | 0.5         | 1.0         | 1.0       | 0.6         |
|               | <i>Os03t0346800-00</i> | 1.0         | 1.0       | 0.5         | 1.0         | 1.0       | 0.7         |
|               | <i>Os02t0832700-01</i> | 1.0         | 1.0       | 0.5         | 1.0         | 1.2       | 0.8         |
|               | <i>Os02t0832700-02</i> | 1.0         | 1.0       | 0.4         | 1.0         | 1.0       | 0.7         |
|               | <i>Os04t0298200-01</i> | 0.8         | 0.8       | 0.4         | 1.0         | 0.8       | 1.2         |
|               | <i>Os03t0226400-01</i> | 1.0         | 1.0       | 0.3         | 1.0         | 0.8       | 1.2         |
|               | <i>Os03t0226400-02</i> | 1.0         | 1.0       | 0.3         | 1.0         | 0.8       | 1.2         |
| HMA           | <i>Os02t0585200-01</i> | 0.1         | 1.9       | <b>32.0</b> | 1.0         | 1.0       | 2.1         |
|               | <i>Os03t0152000-01</i> | 0.1         | 0.6       | <b>32.0</b> | 1.0         | 1.0       | 1.0         |
|               | <i>Os02t0584800-01</i> | 0.4         | 0.5       | <b>32.0</b> | 1.0         | 0.5       | 0.8         |
|               | <i>Os02t0585100-00</i> | 0.3         | 0.6       | <b>23.2</b> | 1.0         | 1.0       | <b>5.2</b>  |
|               | <i>Os02t0584700-01</i> | 0.2         | 0.4       | <b>17.5</b> | 1.0         | 1.0       | 1.0         |
|               | <i>Os03t0372600-00</i> | 1.0         | 1.0       | <b>9.9</b>  | 1.0         | 1.0       | 2.4         |
|               | <i>Os02t0530100-02</i> | 3.6         | 4.2       | <b>7.2</b>  | 1.4         | 1.0       | 0.4         |
|               | <i>Os02t0530100-01</i> | 3.4         | 3.9       | <b>7.0</b>  | 1.0         | 1.0       | 0.4         |
|               | <i>Os01t0976300-01</i> | 1.0         | 1.5       | <b>6.4</b>  | 1.0         | 1.0       | <b>13.8</b> |
|               | <i>Os04t0244800-01</i> | 1.0         | 1.0       | 3.7         | 1.0         | 1.6       | <b>5.6</b>  |
|               | <i>Os06t0542300-01</i> | 2.0         | 1.0       | 2.4         | 1.0         | 1.0       | <b>15.2</b> |
|               | <i>Os06t0665800-01</i> | 0.8         | 0.7       | 2.3         | 1.0         | 1.4       | <b>5.9</b>  |
|               | <i>Os04t0533900-01</i> | 2.1         | 3.2       | 4.3         | 1.0         | 1.0       | 2.8         |
|               | <i>Os04t0661100-00</i> | 1.0         | 1.0       | 4.2         | 1.0         | 1.0       | 1.0         |
|               | <i>Os01t0826000-00</i> | 1.0         | 1.0       | 3.8         | 1.0         | 1.0       | 0.5         |
|               | <i>Os10t0209700-01</i> | 1.0         | 1.0       | 3.3         | 1.3         | 1.4       | 0.2         |
|               | <i>Os01t0933200-00</i> | 0.7         | 0.8       | 3.1         | 1.2         | 1.0       | 0.9         |
|               | <i>Os10t0537400-00</i> | 1.0         | 1.0       | 2.4         | 1.0         | 1.0       | 1.0         |
|               | <i>Os03t0126700-01</i> | 0.6         | 0.5       | 2.1         | 1.0         | 1.0       | 2.2         |
|               | <i>Os08t0205400-01</i> | 1.5         | 1.7       | 1.9         | 0.8         | 1.2       | 1.8         |
|               | <i>Os03t0111400-01</i> | 2.2         | 3.4       | 1.9         | 1.0         | 1.0       | 4.4         |
|               | <i>Os08t0403300-00</i> | 1.0         | 2.1       | 1.7         | 1.0         | 2.4       | <b>6.4</b>  |
|               | <i>Os10t0506100-01</i> | 1.0         | 1.0       | 1.7         | 1.0         | 1.0       | 1.2         |
|               | <i>Os06t0700700-01</i> | 1.3         | 1.0       | 1.7         | 1.7         | 1.0       | 1.0         |
|               | <i>Os02t0196600-01</i> | 1.3         | 1.2       | 1.6         | 1.3         | 1.4       | 2.3         |
|               | <i>Os12t0421000-01</i> | 1.0         | 1.3       | 1.6         | 1.0         | 1.0       | 2.0         |
|               | <i>Os01t0595201-00</i> | 2.4         | 2.6       | 1.5         | 1.0         | 1.0       | 1.0         |
|               | <i>Os02t0172600-00</i> | 1.5         | 1.4       | 1.5         | 1.0         | 1.3       | 1.5         |
|               | <i>Os04t0556000-01</i> | 2.8         | 2.3       | 1.3         | 1.0         | 1.0       | 3.7         |
|               | <i>Os10t0532300-01</i> | 0.8         | 0.8       | 1.3         | 1.0         | 1.5       | 2.3         |
|               | <i>Os04t0581800-01</i> | 1.0         | 1.0       | 1.0         | 1.0         | 2.5       | 1.0         |
|               | <i>Os01t0249700-00</i> | 1.0         | 1.0       | 1.0         | 1.0         | 1.0       | 1.0         |
|               | <i>Os01t0758000-00</i> | 1.0         | 1.0       | 1.0         | 1.0         | 1.0       | 1.0         |
|               | <i>Os02t0819000-00</i> | 1.0         | 1.0       | 1.0         | 1.0         | 1.0       | 1.0         |
|               | <i>Os03t0156600-01</i> | 1.0         | 1.0       | 1.0         | 1.0         | 1.0       | 1.0         |
|               | <i>Os03t0383900-01</i> | 1.0         | 1.0       | 1.0         | 1.0         | 1.0       | 1.0         |
|               | <i>Os05t0368600-01</i> | 1.0         | 0.5       | 1.0         | 1.0         | 1.0       | 1.0         |
|               | <i>Os01t0309800-01</i> | 1.0         | 1.0       | 1.0         | 1.3         | 0.9       | 0.4         |
|               | <i>Os03t0388100-02</i> | 1.0         | 1.0       | 1.0         | 0.5         | 0.4       | 0.4         |
|               | <i>Os03t0388100-01</i> | 1.0         | 1.0       | 1.0         | 0.5         | 0.5       | 0.4         |
|               | <i>Os03t0751600-02</i> | 1.0         | 1.0       | 1.0         | 1.0         | 1.0       | 0.3         |
|               | <i>Os03t0751600-01</i> | 1.0         | 1.0       | 1.0         | 1.0         | 1.0       | 0.3         |
|               | <i>Os01t0507700-01</i> | 1.0         | 0.7       | 0.8         | 1.0         | 1.4       | 1.0         |
|               | <i>Os07t0298900-01</i> | 1.0         | 0.5       | 0.7         | 1.0         | 1.0       | 1.0         |
|               | <i>Os07t0623200-02</i> | 1.0         | 1.0       | 0.7         | 1.0         | 1.0       | 1.1         |

|      |                        |            |     |             |     |     |             |
|------|------------------------|------------|-----|-------------|-----|-----|-------------|
|      | <i>Os07t0623200-03</i> | 1.0        | 1.0 | 0.7         | 1.0 | 1.0 | 1.0         |
|      | <i>Os03t0178100-00</i> | 1.0        | 1.0 | 0.7         | 1.1 | 0.9 | <b>5.2</b>  |
|      | <i>Os07t0232900-00</i> | 0.7        | 0.5 | 0.6         | 1.0 | 1.0 | 0.6         |
|      | <i>Os07t0623200-01</i> | 1.0        | 1.0 | 0.6         | 1.0 | 1.0 | 1.0         |
|      | <i>Os05t0534500-01</i> | 1.0        | 1.0 | 0.6         | 1.0 | 1.0 | 1.0         |
|      | <i>Os01t0927300-01</i> | 1.0        | 1.0 | 0.6         | 0.5 | 1.0 | 0.6         |
|      | <i>Os01t0192500-00</i> | 1.0        | 1.0 | 0.5         | 1.0 | 1.0 | 1.0         |
|      | <i>Os07t0671400-01</i> | 1.0        | 1.0 | 0.5         | 1.0 | 1.0 | 0.6         |
|      | <i>Os04t0573200-01</i> | 1.0        | 1.0 | 0.4         | 1.0 | 1.0 | 1.1         |
|      | <i>Os04t0573200-02</i> | 1.0        | 1.0 | 0.4         | 1.0 | 1.0 | 1.0         |
|      | <i>Os04t0590100-00</i> | 2.4        | 1.0 | 0.4         | 1.0 | 1.0 | 1.0         |
|      | <i>Os03t0120400-01</i> | 1.0        | 0.7 | 0.4         | 1.0 | 0.5 | 0.1         |
|      | <i>Os08t0512200-00</i> | 1.0        | 1.0 | 0.3         | 1.0 | 1.0 | 1.0         |
|      | <i>Os03t0819400-01</i> | 1.0        | 1.0 | 0.3         | 1.0 | 1.0 | 0.4         |
|      | <i>Os02t0510600-01</i> | 1.0        | 1.0 | 0.3         | 0.5 | 0.6 | 1.2         |
|      | <i>Os01t0719600-01</i> | 1.0        | 0.7 | 0.3         | 1.0 | 1.0 | 0.0         |
|      | <i>Os01t0678800-01</i> | 1.6        | 1.7 | 0.3         | 1.0 | 1.0 | 1.0         |
|      | <i>Os04t0390100-01</i> | 1.0        | 1.5 | 0.2         | 1.0 | 1.0 | 4.6         |
|      | <i>Os12t0144600-01</i> | 1.0        | 1.0 | 0.2         | 1.0 | 1.0 | 0.7         |
|      | <i>Os11t0147500-01</i> | 1.0        | 1.4 | 0.2         | 1.0 | 1.0 | 0.6         |
|      | <i>Os11t0147500-02</i> | 1.0        | 1.0 | 0.2         | 1.0 | 1.0 | 0.6         |
|      | <i>Os01t0125600-01</i> | 0.7        | 0.8 | 0.1         | 1.0 | 1.0 | 0.7         |
|      | <i>Os03t0861400-00</i> | 1.0        | 1.0 | 0.1         | 1.0 | 1.0 | 1.0         |
|      | <i>Os08t0405700-01</i> | 0.6        | 0.4 | 0.1         | 1.0 | 1.0 | 1.0         |
| MatE | <i>Os10t0344000-01</i> | <b>7.3</b> | 3.9 | <b>12.2</b> | 1.0 | 1.0 | <b>13.6</b> |
|      | <i>Os03t0188100-01</i> | 1.8        | 1.7 | <b>9.8</b>  | 2.1 | 2.8 | <b>14.5</b> |
|      | <i>Os10t0345100-01</i> | 0.7        | 0.7 | 4.5         | 1.0 | 1.0 | <b>6.7</b>  |
|      | <i>Os06t0494400-01</i> | 1.6        | 2.3 | 4.9         | 1.3 | 1.4 | 2.2         |
|      | <i>Os10t0344500-00</i> | 2.0        | 1.0 | 3.9         | 1.0 | 1.5 | 1.2         |
|      | <i>Os03t0571900-01</i> | 1.0        | 2.3 | 2.6         | 1.0 | 1.6 | 1.7         |
|      | <i>Os04t0571600-01</i> | 0.5        | 0.3 | 2.5         | 1.0 | 0.5 | 0.2         |
|      | <i>Os04t0373400-01</i> | 1.5        | 0.7 | 2.1         | 1.0 | 1.0 | 4.0         |
|      | <i>Os01t0504500-01</i> | 1.6        | 2.0 | 1.9         | 1.4 | 1.6 | 4.2         |
|      | <i>Os12t0125800-00</i> | 1.0        | 1.0 | 1.9         | 1.0 | 1.0 | 1.0         |
|      | <i>Os06t0495100-00</i> | 1.0        | 1.0 | 1.6         | 1.0 | 1.0 | 2.4         |
|      | <i>Os10t0190900-01</i> | 1.0        | 1.0 | 1.6         | 1.0 | 1.0 | 2.1         |
|      | <i>Os11t0126100-01</i> | 1.0        | 1.0 | 1.6         | 1.0 | 1.0 | 0.4         |
|      | <i>Os03t0626700-01</i> | 1.0        | 1.0 | 1.4         | 1.0 | 1.0 | 1.0         |
|      | <i>Os07t0502200-01</i> | 1.0        | 2.0 | 1.3         | 1.0 | 1.1 | <b>6.2</b>  |
|      | <i>Os03t0572900-01</i> | 1.0        | 1.3 | 1.0         | 1.0 | 1.0 | <b>7.4</b>  |
|      | <i>Os08t0480000-01</i> | 0.6        | 0.5 | 1.0         | 1.0 | 0.7 | 1.3         |
|      | <i>Os01t0766000-00</i> | 1.0        | 1.0 | 1.0         | 1.0 | 1.0 | 1.0         |
|      | <i>Os02t0821600-00</i> | 1.0        | 1.0 | 1.0         | 1.0 | 1.0 | 1.0         |
|      | <i>Os06t0558300-00</i> | 1.0        | 1.0 | 1.0         | 1.0 | 1.0 | 1.0         |
|      | <i>Os12t0552600-00</i> | 1.0        | 1.0 | 1.0         | 1.0 | 1.0 | 1.0         |
|      | <i>Os05t0554000-02</i> | 0.8        | 0.8 | 1.0         | 1.0 | 1.0 | 1.0         |
|      | <i>Os03t0858800-01</i> | 0.4        | 0.3 | 1.0         | 1.8 | 2.4 | 1.0         |
|      | <i>Os05t0554000-01</i> | 0.8        | 0.7 | 1.0         | 1.0 | 1.0 | 0.7         |
|      | <i>Os11t0129200-00</i> | 1.0        | 1.0 | 1.0         | 1.0 | 1.0 | 0.3         |
|      | <i>Os03t0229500-00</i> | 0.4        | 0.3 | 1.0         | 1.0 | 0.5 | 0.2         |
|      | <i>Os03t0571700-01</i> | 1.0        | 1.0 | 1.0         | 1.6 | 1.7 | 0.1         |
|      | <i>Os01t0504500-02</i> | 1.5        | 1.9 | 0.9         | 1.2 | 1.3 | <b>5.4</b>  |
|      | <i>Os01t0684900-01</i> | 1.0        | 1.3 | 0.8         | 1.0 | 0.7 | 1.6         |
|      | <i>Os11t0129000-00</i> | 1.0        | 1.7 | 0.8         | 1.0 | 1.0 | 0.3         |
|      | <i>Os12t0126000-01</i> | 2.1        | 2.6 | 0.7         | 1.4 | 1.4 | 1.0         |
|      | <i>Os09t0524300-00</i> | 1.0        | 1.0 | 0.7         | 1.0 | 1.0 | 0.8         |
|      | <i>Os03t0216700-01</i> | 0.7        | 0.4 | 0.7         | 1.7 | 1.4 | 1.0         |
|      | <i>Os02t0676400-00</i> | 0.5        | 1.0 | 0.7         | 1.0 | 1.0 | 1.0         |
|      | <i>Os06t0707100-01</i> | 1.0        | 1.0 | 0.7         | 1.0 | 1.3 | 1.2         |
|      | <i>Os12t0106600-01</i> | 1.0        | 1.0 | 0.7         | 1.0 | 1.0 | 0.5         |
|      | <i>Os02t0122200-00</i> | 1.0        | 1.0 | 0.6         | 1.0 | 1.2 | 2.3         |
|      | <i>Os08t0545900-00</i> | 1.0        | 1.0 | 0.6         | 1.0 | 1.0 | 1.0         |
|      | <i>Os07t0516600-01</i> | 0.5        | 1.0 | 0.6         | 1.0 | 1.0 | 0.3         |
|      | <i>Os12t0615700-01</i> | 1.0        | 1.0 | 0.6         | 1.0 | 1.0 | 0.7         |

|           |                                                                                                                                                                                                                                                                               |            |            |             |     |     |             |
|-----------|-------------------------------------------------------------------------------------------------------------------------------------------------------------------------------------------------------------------------------------------------------------------------------|------------|------------|-------------|-----|-----|-------------|
|           | <i>Os03t0839200-01</i>                                                                                                                                                                                                                                                        | 1.0        | 1.3        | 0.6         | 1.0 | 0.6 | 0.2         |
|           | <i>Os08t0550200-01</i>                                                                                                                                                                                                                                                        | 1.0        | 1.0        | 0.6         | 1.0 | 1.0 | 0.8         |
|           | <i>Os09t0468000-01</i>                                                                                                                                                                                                                                                        | 1.0        | 1.0        | 0.6         | 1.0 | 1.0 | 0.8         |
|           | <i>Os08t0562800-01</i>                                                                                                                                                                                                                                                        | 0.6        | 0.6        | 0.5         | 1.0 | 1.0 | 0.5         |
|           | <i>Os09t0548300-01</i>                                                                                                                                                                                                                                                        | 1.0        | 0.8        | 0.4         | 1.0 | 1.3 | 0.5         |
|           | <i>Os01t0919100-00</i>                                                                                                                                                                                                                                                        | 1.0        | 1.0        | 0.4         | 1.0 | 1.0 | 0.8         |
|           | <i>Os08t0562800-02</i>                                                                                                                                                                                                                                                        | 0.6        | 0.6        | 0.4         | 1.0 | 0.8 | 0.3         |
|           | <i>Os10t0195000-01</i>                                                                                                                                                                                                                                                        | 1.0        | 0.2        | 0.4         | 1.0 | 1.0 | 0.6         |
|           | <i>Os10t0206800-01</i>                                                                                                                                                                                                                                                        | 0.4        | 0.4        | 0.3         | 1.0 | 1.1 | 0.5         |
|           | <i>Os10t0206800-02</i>                                                                                                                                                                                                                                                        | 0.4        | 0.4        | 0.3         | 1.0 | 1.0 | 0.5         |
|           | <i>Os07t0108200-00</i>                                                                                                                                                                                                                                                        | 1.0        | 1.9        | 0.3         | 1.0 | 1.0 | 1.0         |
|           | <i>Os03t0570800-01</i>                                                                                                                                                                                                                                                        | 1.0        | 0.6        | 0.2         | 1.5 | 1.6 | 0.7         |
|           | <i>Os06t0495500-01</i>                                                                                                                                                                                                                                                        | 1.0        | 1.0        | 0.2         | 1.0 | 1.0 | 1.0         |
|           | <i>Os10t0344900-01</i>                                                                                                                                                                                                                                                        | 0.4        | 0.5        | 0.2         | 1.0 | 1.0 | 1.0         |
| Nramp     | <i>Os07t0258400-02</i>                                                                                                                                                                                                                                                        | 2.3        | 1.5        | <b>5.0</b>  | 1.0 | 1.0 | 1.5         |
|           | <i>Os07t0258400-01</i>                                                                                                                                                                                                                                                        | 2.3        | 1.6        | <b>5.0</b>  | 1.0 | 1.0 | 1.7         |
|           | <i>Os03t0208500-01</i>                                                                                                                                                                                                                                                        | 1.3        | 1.3        | 2.1         | 1.0 | 1.0 | 1.6         |
|           | <i>Os12t0581600-01</i>                                                                                                                                                                                                                                                        | 1.0        | 1.0        | 1.6         | 0.6 | 0.7 | 0.8         |
|           | <i>Os06t0676000-01</i>                                                                                                                                                                                                                                                        | 1.2        | 1.3        | 1.6         | 1.0 | 1.0 | 1.0         |
|           | <i>Os01t0503400-05</i>                                                                                                                                                                                                                                                        | 2.5        | 2.1        | 1.5         | 1.0 | 1.0 | 0.8         |
|           | <i>Os01t0503400-04</i>                                                                                                                                                                                                                                                        | 2.1        | 1.9        | 1.4         | 1.0 | 1.0 | 1.3         |
|           | <i>Os01t0503400-03</i>                                                                                                                                                                                                                                                        | 2.2        | 1.7        | 1.3         | 0.8 | 0.8 | 0.5         |
|           | <i>Os03t0607400-01</i>                                                                                                                                                                                                                                                        | 1.0        | 1.0        | 1.0         | 1.0 | 1.0 | 1.2         |
|           | <i>Os01t0733001-00</i>                                                                                                                                                                                                                                                        | 0.3        | 0.3        | 1.0         | 1.0 | 1.0 | 1.0         |
|           | <i>Os03t0606600-00</i>                                                                                                                                                                                                                                                        | 1.0        | 1.0        | 1.0         | 1.0 | 1.0 | 0.7         |
|           | <i>Os03t0700800-02</i>                                                                                                                                                                                                                                                        | 1.0        | 1.0        | 0.6         | 1.5 | 1.6 | 1.6         |
|           | <i>Os03t0700800-01</i>                                                                                                                                                                                                                                                        | 1.0        | 1.0        | 0.6         | 1.3 | 1.4 | 0.9         |
|           | <i>Os07t0257200-01</i>                                                                                                                                                                                                                                                        | 1.0        | 0.5        | 0.3         | 1.9 | 1.8 | 0.4         |
|           | <i>Os02t0131800-01</i>                                                                                                                                                                                                                                                        | 0.5        | 0.2        | 0.0         | 1.0 | 1.0 | 0.7         |
| PDR_assoc | <i>Os01t0342750-01</i>                                                                                                                                                                                                                                                        | 1.0        | 1.6        | <b>5.8</b>  | 1.0 | 1.0 | 2.5         |
|           | <i>Os01t0609900-02</i>                                                                                                                                                                                                                                                        | 3.2        | 4.0        | 2.1         | 0.8 | 0.7 | <b>32.0</b> |
|           | <i>Os01t0609300-01</i>                                                                                                                                                                                                                                                        | 4.3        | <b>6.8</b> | 2.0         | 1.0 | 1.0 | <b>32.0</b> |
|           | <i>Os08t0384500-01</i>                                                                                                                                                                                                                                                        | 3.0        | 3.8        | 1.3         | 0.7 | 0.7 | <b>5.2</b>  |
|           | <i>Os01t0516900-00</i>                                                                                                                                                                                                                                                        | 1.0        | 1.0        | 1.0         | 1.0 | 1.0 | 1.0         |
|           | <i>Os09t0332300-00</i>                                                                                                                                                                                                                                                        | 1.0        | 1.0        | 1.0         | 1.0 | 1.0 | 1.0         |
|           | <i>Os09t0333000-00</i>                                                                                                                                                                                                                                                        | 1.0        | 1.0        | 1.0         | 1.0 | 1.0 | 1.0         |
|           | <i>Os06t0554800-01</i>                                                                                                                                                                                                                                                        | 2.0        | 2.4        | 0.8         | 1.1 | 0.9 | 0.8         |
|           | <i>Os01t0609200-00</i>                                                                                                                                                                                                                                                        | 1.0        | 2.5        | 0.7         | 1.0 | 1.0 | 1.1         |
|           | <i>Os01t0724500-01</i>                                                                                                                                                                                                                                                        | 1.0        | 1.0        | 0.6         | 1.0 | 1.0 | 1.0         |
|           | <i>Os12t0512700-01</i>                                                                                                                                                                                                                                                        | 1.0        | 0.7        | 0.5         | 1.0 | 1.0 | 1.0         |
|           | <i>Os01t0609000-00</i>                                                                                                                                                                                                                                                        | 1.8        | 1.0        | 0.4         | 1.0 | 1.0 | 0.9         |
| Zip       | <i>Os03t0411800-01</i>                                                                                                                                                                                                                                                        | 2.3        | 2.3        | <b>10.6</b> | 1.0 | 1.0 | <b>14.6</b> |
|           | <i>Os04t0613000-01</i>                                                                                                                                                                                                                                                        | 1.0        | 1.0        | 2.0         | 1.0 | 1.0 | 1.0         |
|           | <i>Os03t0667500-01</i>                                                                                                                                                                                                                                                        | <b>6.3</b> | <b>6.7</b> | 2.0         | 1.0 | 1.0 | 0.7         |
|           | <i>Os01t0972200-00</i>                                                                                                                                                                                                                                                        | 1.0        | 1.0        | 1.7         | 1.0 | 1.0 | 2.1         |
|           | <i>Os07t0232800-00</i>                                                                                                                                                                                                                                                        | 1.0        | 2.5        | 1.5         | 1.0 | 1.4 | 1.3         |
|           | <i>Os03t0667300-00</i>                                                                                                                                                                                                                                                        | 2.7        | 1.0        | 1.4         | 1.0 | 1.0 | 1.0         |
|           | <i>Os08t0207500-01</i>                                                                                                                                                                                                                                                        | 0.8        | 1.4        | 1.3         | 1.0 | 1.0 | 0.1         |
|           | <i>Os05t0164800-01</i>                                                                                                                                                                                                                                                        | 1.0        | 1.0        | 1.0         | 1.0 | 1.0 | 1.0         |
|           | <i>Os05t0164800-02</i>                                                                                                                                                                                                                                                        | 1.0        | 1.0        | 1.0         | 1.0 | 1.0 | 1.0         |
|           | <i>Os05t0198400-01</i>                                                                                                                                                                                                                                                        | 0.5        | 0.6        | 0.8         | 1.0 | 1.0 | 0.3         |
|           | <i>Os05t0316100-01</i>                                                                                                                                                                                                                                                        | 1.0        | 0.8        | 0.7         | 1.0 | 1.2 | 1.0         |
|           | <i>Os05t0316100-02</i>                                                                                                                                                                                                                                                        | 1.0        | 0.8        | 0.7         | 1.0 | 1.2 | 0.8         |
|           | <i>Os08t0467400-01</i>                                                                                                                                                                                                                                                        | 0.8        | 1.0        | 0.6         | 1.0 | 1.3 | 1.0         |
|           | <i>Os08t0467400-02</i>                                                                                                                                                                                                                                                        | 0.8        | 1.0        | 0.6         | 1.0 | 1.4 | 1.2         |
|           | <i>Os08t0467400-03</i>                                                                                                                                                                                                                                                        | 0.8        | 1.0        | 0.6         | 1.0 | 1.4 | 1.2         |
|           | <i>Os02t0196000-01</i>                                                                                                                                                                                                                                                        | 1.0        | 0.7        | 0.5         | 1.0 | 1.0 | 0.8         |
|           | <i>Os06t0566300-00</i>                                                                                                                                                                                                                                                        | 1.0        | 1.8        | 0.3         | 1.0 | 1.0 | 0.5         |
|           | <i>Os05t0472700-01</i>                                                                                                                                                                                                                                                        | 0.5        | 0.7        | 0.3         | 1.0 | 1.0 | 0.4         |
|           | <i>Os05t0472400-00</i>                                                                                                                                                                                                                                                        | 0.3        | 0.3        | 0.2         | 1.0 | 1.0 | 1.0         |
|           | Gene expression of metal ion transporters containing Pfam domains [PF01554 (MatE), PF08370 (PDR_assoc), PF01545 (Cation_efflux), PF02535 (Zip), PF00403 (HMA), PF01566 (Nramp)] is shown. Bold characters show fold changes greater than 5 in one or more tissues/treatments. |            |            |             |     |     |             |
